# Supplementary material
Source: PubMed Central journal article supplement (PMC4844010)
Supplement: NIHMS776595-supplement.pdf [file NIHMS776595-supplement.pdf]

**Figure S1**

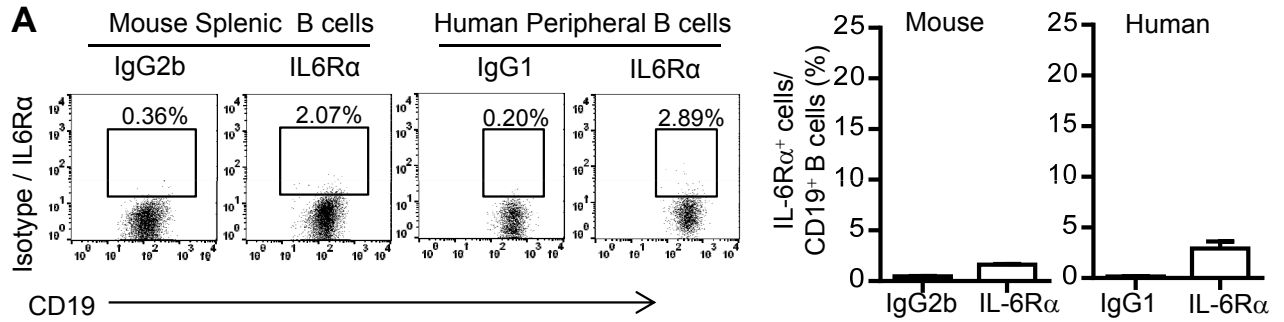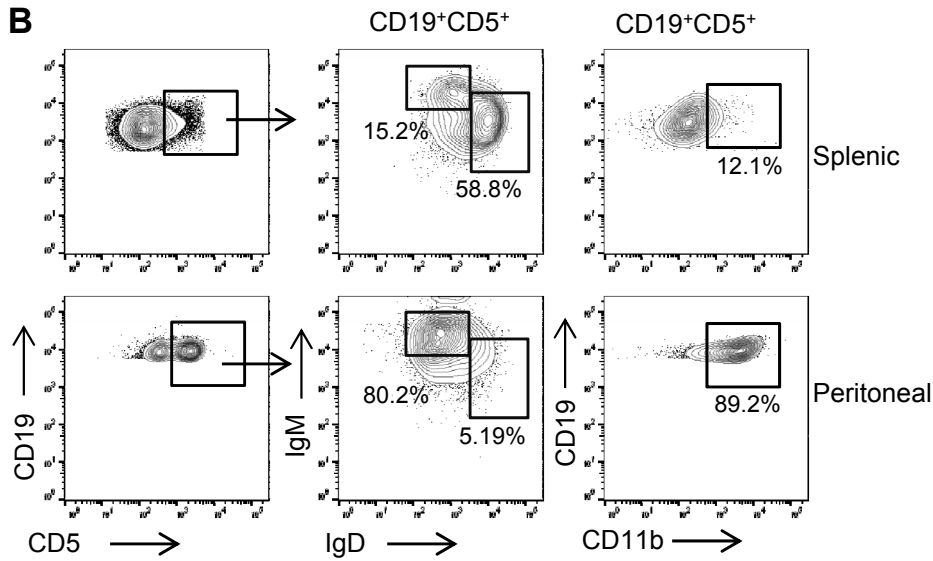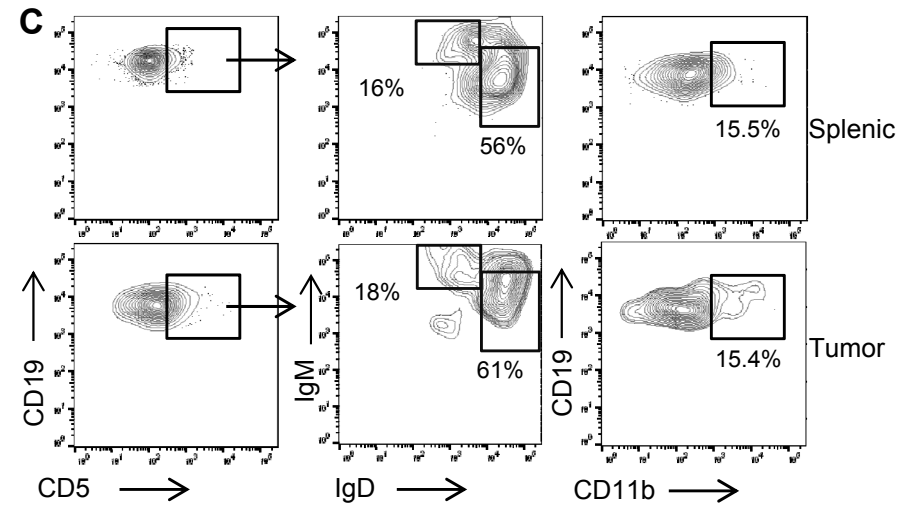

**Figure S2**

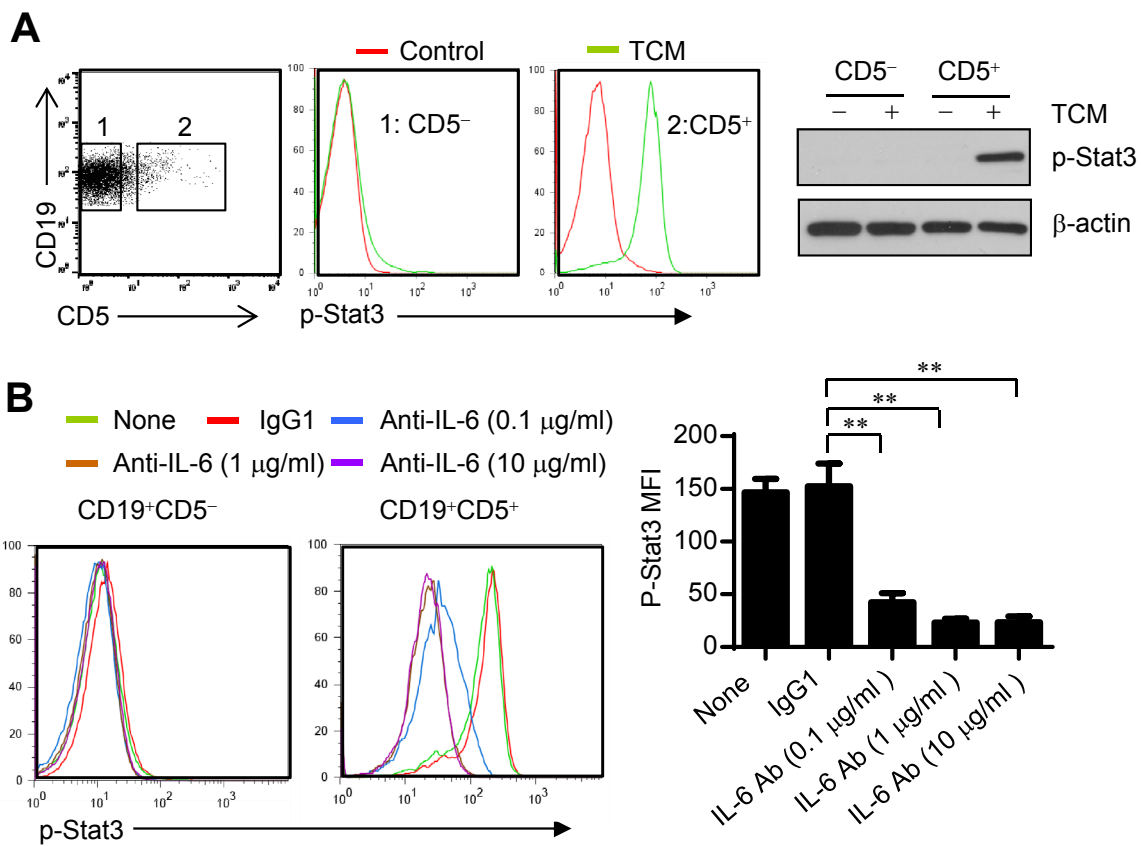

**Figure S3**

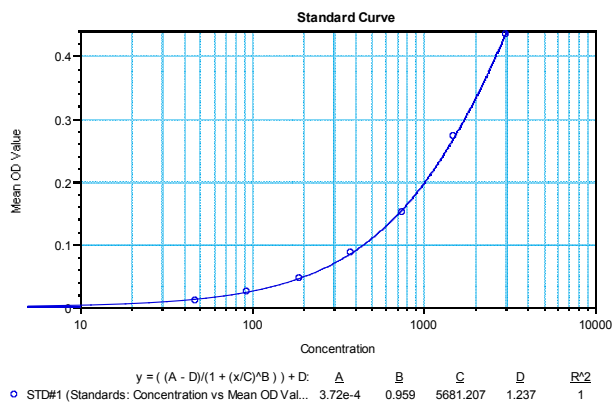

**OD 450 value (Mouse sIL-6 ELISA)**

| Group      | IL-6 stimulation                    |                                     |                                     |                                     | TCM treatment                      |                                    |
|------------|-------------------------------------|-------------------------------------|-------------------------------------|-------------------------------------|------------------------------------|------------------------------------|
|            | CD5 <sup>+</sup> IL-6R <sup>+</sup> | CD5 <sup>-</sup> IL-6R <sup>+</sup> | CD5 <sup>+</sup> IL-6R <sup>-</sup> | CD5 <sup>-</sup> IL-6R <sup>-</sup> | CD19 <sup>+</sup> CD5 <sup>+</sup> | CD19 <sup>+</sup> CD5 <sup>-</sup> |
| OD(450 nm) | -0.002                              | -0.004                              | -0.008                              | -0.006                              | -0.005                             | -0.003                             |

**Figure S4**

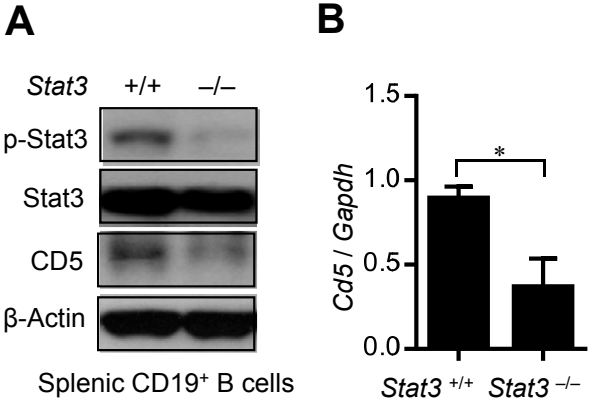

**Figure S5**

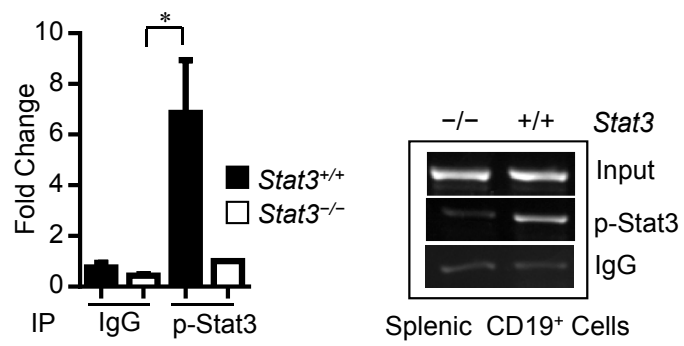

**Figure S6**

**A**

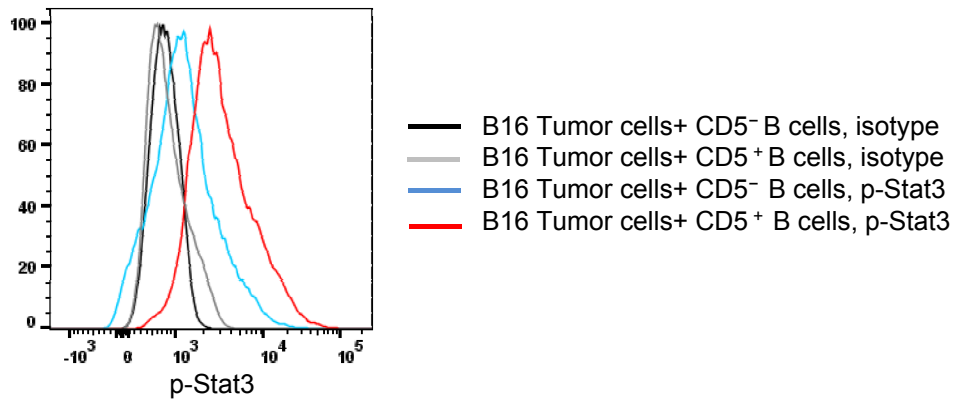

**B**

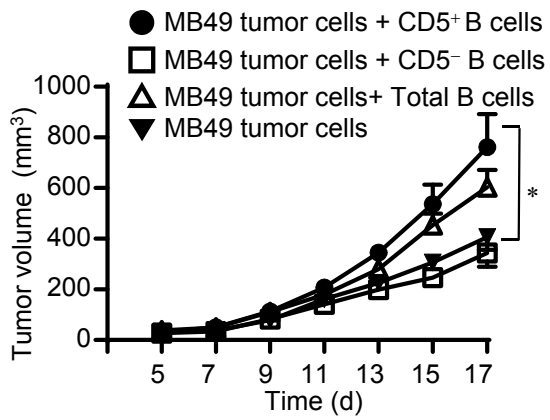

**C**

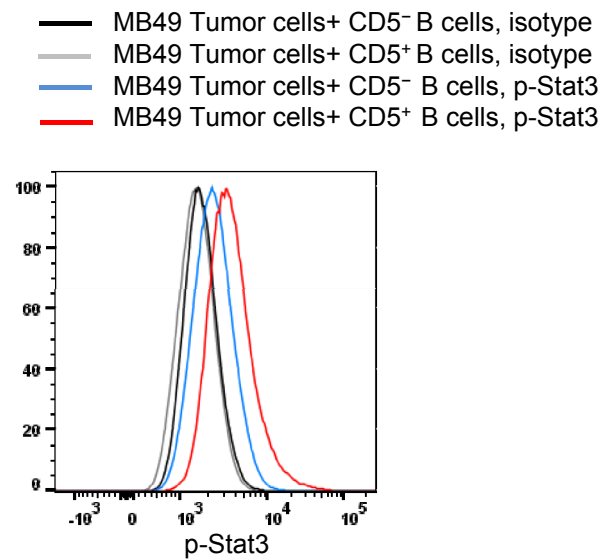

**Figure S7**

**A**

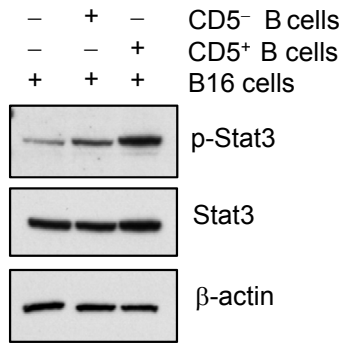

**B**

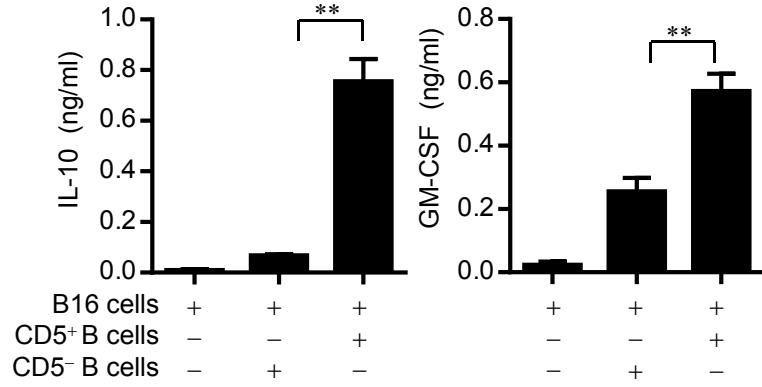

## SUPPLEMENTAL FIGURE LEGENDS

**Figure S1. Characterization of IL-6R $\alpha$ <sup>+</sup> B cells and CD5<sup>+</sup> B cells. Related to Figure 1.** (A) Representative dot plots (left) and statistical results (right) of flow cytometry analyses showing IL-6R $\alpha$ <sup>+</sup> cell frequencies within CD19<sup>+</sup> B cells. Data are shown as means  $\pm$  SEM ( $n = 15$  and  $9$  for mouse and human samples, respectively). (B-C) Flow cytometry analyses of CD5<sup>+</sup> B cells from spleen and peritoneal cavity of naïve C57BL/6 mice (B), and from spleen and tumors harvested from B16 tumor bearing C57BL/6 mice (C). Single-cell suspensions derived from mouse spleen, peritoneal cavity (B) and tumor (C) were stained with anti-CD19, CD5, IgM, IgD and CD11b, to detect mouse CD5<sup>+</sup>IgM<sup>hi</sup>IgD<sup>low</sup> cells as well as CD5<sup>+</sup>CD11b<sup>+</sup> B1 cells.

**Figure S2. CD5 is crucial for IL-6-dependent Stat3 activation in B cells induced by TCM. Related to Figure 1.** (A) Stat3 activation induced by 5% TCM in mouse splenic CD5<sup>+</sup> and CD5<sup>-</sup> B cells, as evaluated by flow cytometry (left) and western blotting of FACS-sorted cells (right). (B) Representative histograms of flow cytometry showing the inhibitory effect by IL-6 antibody neutralization on Stat3 activation induced in CD5<sup>+</sup> and CD5<sup>-</sup> B cells (left). Bar graphs indicate statistical results of mean fluorescence intensity (MFI), means  $\pm$  SEM (right;  $n = 3$ ).

**Figure S3. sIL-6R $\alpha$  does not contribute measurably to IL-6-induced CD5-associated Stat3 activation. Related to Figure 2.** ELISA determining sIL-6R $\alpha$  concentration in culture medium with either IL-6 or TCM.

**Figure S4. Ablating Stat3 in mouse splenic and tumor-associated B cells abrogates CD5 expression. Related to Figure 5.** (A-B) Western blotting (A) and real-time RT-PCR (B) measuring CD5 protein expression in splenic B cells from B16 tumor-bearing mice with or without *Stat3* ablation in CD19<sup>+</sup> cells, and CD5 mRNA level in CD19<sup>+</sup> B cells enriched from the tumors, respectively. Data represent means  $\pm$  SEM of 3 independent experiments, each involving 6 pooled mice per group done in triplicates.

**Figure S5. ChIP assay showing p-Stat3 binding to the *Cd5* promoter. Related to Figure 5.** Chromatins were prepared from splenic CD19<sup>+</sup> B cells of tumor-bearing mice. Quantitative real-time PCR (left) or regular PCR (right) showing the relative amounts of specific DNA fragments of *CD5* promoter after immunoprecipitating by p-Stat3/IgG and normalizing to the input. Results are means  $\pm$  SEM ( $n = 3$ ).

**Figure S6. CD5<sup>+</sup> B cells significantly contribute to tumor cell Stat3 activation and tumor growth. Related to Figure 6.** (A) Tumors grown from B16 tumor cells mixed with either CD5<sup>+</sup> B cells or CD5<sup>-</sup> B cells were harvested. Single-cell suspensions were subjected to flow cytometric analysis to detect p-Stat3 levels in tumor cells (gating was on tumor cells). (B) Growth curves of MB49 tumors implanted with CD5<sup>+</sup> or CD5<sup>-</sup> B cells in *Rag1*<sup>-/-</sup> mice. Representative results of 2 independent experiments ( $n = 6$ ) are shown as means  $\pm$  SEM \*\*  $P < 0.01$ . (C) Flow cytometry showing elevated p-Stat3 level in tumor cells derived from MB49 tumors grown in *Rag1*<sup>-/-</sup> mice in the presence of either CD5<sup>+</sup> B cells or CD5<sup>-</sup> B cells.

**Figure S7. CD5<sup>+</sup> B cells-mediated Stat3 activation in B16 tumor cells involves cytokines IL-10 and GM-CSF. Related to Figure 6.** (A) Irradiated B16 tumor cells were co-cultured with CD5<sup>+</sup> or CD5<sup>-</sup> splenic B cells for 3 days, followed by cell lysate preparation of B16 tumor cells for Western blotting to detect p-Stat3. (B) Multiplex bead assay detecting IL-10 and GM-CSF production from irradiated B16 tumor cells co-cultured with CD5<sup>+</sup> or CD5<sup>-</sup> splenic B cells. Data represent means  $\pm$  SEM ( $n = 3$ ). \*\* $P < 0.01$ .
